# Supplementary material for: Transcriptional Time Course After Rotator Cuff Tear
Source: Front Physiol. 2021 Aug 6;12:707116. doi: 10.3389/fphys.2021.707116 (PMC8378535; doi:10.3389/fphys.2021.707116)
Supplement: Supplementary file 6 [file Data_Sheet_6.XLSX]

## Sheet: NH_metadata_red_tenonly
Samples	Time_Point	CSA	CN	Oil_Red-O	Collagen_Content	Degeneration	Intrafascicular_fat	Interfasciccular_fat	Both_Fat_&_Degeneration
WRC_02_L_S3_R1_001	2	2865.15	3.74688	0.999447	7.25637	1.42857	7.14286	30	1.42857
WRC_05_L_S9_R1_001	2	1843.7	7.32899	8.54377	28.5288	18.75	31.25	62.5	6.25
WRC_06_L_S11_R1_001	2	1866.23	4.86409	1.76006	9.40258	1.72414	1.72414	17.2414	0
WRC_07_L_S13_R1_001	2	3219.1	1.15075	7.53359	14.3089	5.71429	44.2857	32.8571	5.71429
WRC_09_L_S17_R1_001	2	1973.96	1.05777	0.912246	13.744	1.85185	16.6667	59.2593	0
WRC_10_L_S19_R1_001	2	2398.82	3.17092	4.71968	9.03587	4.54545	29.0909	49.0909	4.54545
WRC_11_L_S21_R1_001	4	2161.48	4.85437	3.02314	16.94	25	52.0833	27.0833	25
WRC_12_L_S23_R1_001	4	2868.15	0.931677	4.67643	11.5385	1.72414	13.7931	37.931	1.72414
WRC_13_L_S25_R1_001	4	1832.98	1.06383	2.5177	11.4406	0	33.3333	38.0952	0
WRC_14_L_S27_R1_001	4	3527.97	6.07143	9.40071	35.0481	1.72414	25.8621	22.4138	1.72414
WRC_15_L_S29_R1_001	4	2618.5	2.89179	11.944	30.1876	0	9.58904	41.0959	0
WRC_17_L_S33_R1_001	4	2154.71	8.41035	3.15327	10.7533	1.04167	5.20833	21.875	0
WRC_18_L_S35_R1_001	8	2395	3.86941	10.2003	34.8624	5.88235	37.2549	45.098	1.96078
WRC_19_L_S37_R1_001	8	2122.27	5.39683	17.1295	20.179	5.12821	58.9744	48.7179	5.12821
WRC_21_L_S41_R1_001	8	2668.48	3.89198	3.41124	8.86988	1.20482	16.8675	28.9157	1.20482
WRC_22_L_S43_R1_001	8	2407.53	7.26979	3.91327	8.46248	2.77778	4.16667	22.2222	2.77778
WRC_23_L_S45_R1_001	8	2676.34	7.61421	27.5062	11.37	10	65	60	10
WRC_24_L_S47_R1_001	16	2668.79	9.3361	8.27219	22.993	0	18.75	31.25	0
WRC_rep_01_L_S1_R1_001	16	2224.35	1.5873	4.9404	12.8324	3.27869	8.19672	37.7049	1.63934
WRC_rep_03_L_S5_R1_001	16	2617.67	7.31707	6.5137	12.3181	2.27273	4.54545	25	0
WRC_rep_04_L_S7_R1_001	16	3681.47	12.5144	1.61998	9.96796	1.04167	4.16667	26.0417	1.04167
WRC_rep_16_L_S31_R1_001	16	1827.05	7.58483	21.0919	10.5541	23.0769	73.0769	3.84615	23.0769
WRC_rep_20_L_S39_R1_001	16	2350.72	7.90155	13.5927	18.4414	4.6875	42.1875	40.625	4.6875
WRE1.1L_S1	1	2191.82	3.98506	3.15678	7.86244	11.5385	48.7179	51.2821	6.41026
WRE1.2L_S3	1	2979.84	0.487805	14.8254	9.45434	1.0101	18.1818	24.2424	0
WRE1.3L_S5	1	2275.01	1.32979	2.19373	22.1157	3.63636	24.5455	60	1.81818
WRE1.4L_S7	1	3942.81	4.23077	1.38541	15.1446	3.5	32	56.5	3
WRE1.5L_S9	1	2310.74	0.120048	0.321998	8.09086	3.37079	19.1011	48.3146	2.24719
WRE1.6L_S11	1	1799.56	1.99715	2.77122	10.3426	0	14.0187	64.486	0
